# Supplementary material for: Single-Step Metal-Free Grafting of Cationic Polymer Brushes on Fluorescent Nanodiamonds
Source: Materials (Basel). 2018 Aug 20;11(8):1479. doi: 10.3390/ma11081479 (PMC6119955; doi:10.3390/ma11081479)
Supplement: Supplementary file 1 [file materials-11-01479-s001.pdf]

Supplementary Materials

## Single-Step Metal-Free Grafting of Cationic Polymer Brushes on Fluorescent Nanodiamonds

Shingo Sotoma \*, Feng-Jen Hsieh and Huan-Cheng Chang \*

0 h

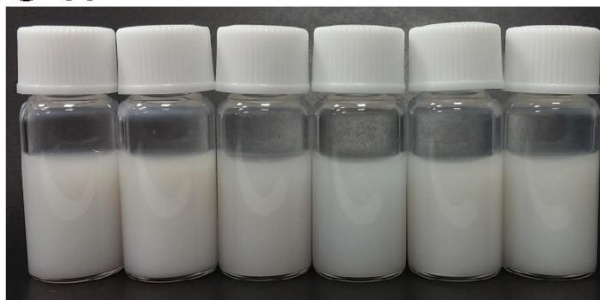

24 h

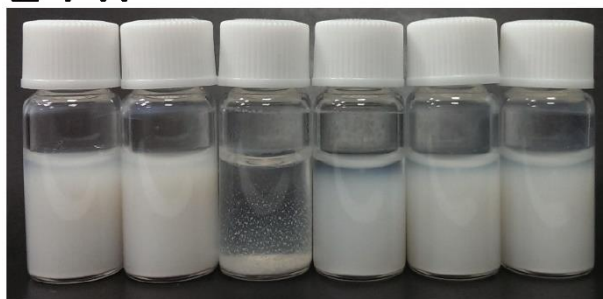

**Figure S1.** Dispersion states of FND samples. FND-bare, FND-HPG, FND-HPGTMA (25%, 50%, and 75%), and FND-PEGTMA in DDW before and after 24 h are shown (from left to right). FND-HPGTMA (25%) precipitated after 24 h presumably because of the lower surface potential.

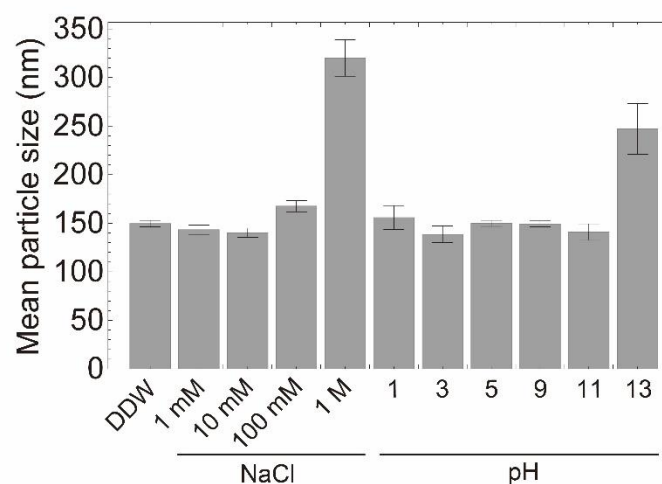

**Figure S2.** Stability test of FND-HPGTMA. Mean particle sizes of FND-HPGTMA in various NaCl concentration and pH aqueous solutions. The data were measured by Zetasizer Nano ZSP, Malvern. Values are means  $\pm$  standard deviations of three measurements.

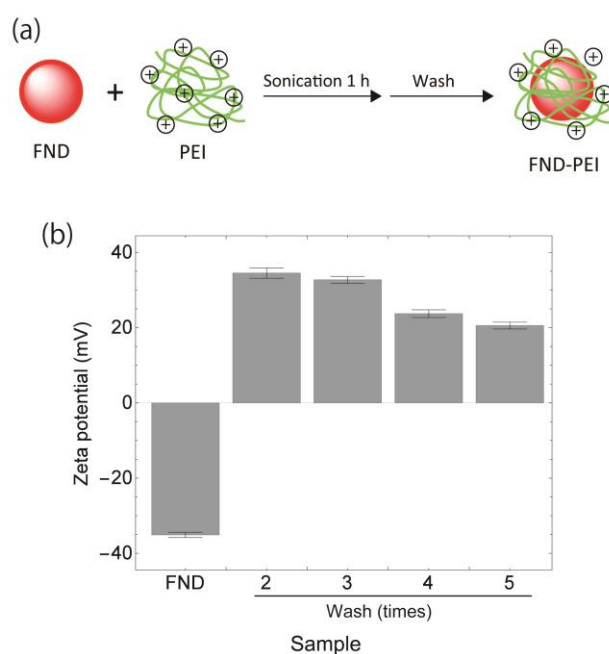

**Figure S3.** Preparation of FND-PEI. (a) Schematic of FND-PEI and (b) Zeta potential values of FND and FND-PEI with various times of washes with DDW. The zeta potential values of FND-PEI decrease with increasing times of wash. In the experiment, we used the sample after second wash. Values are means  $\pm$  standard deviations of three measurements.

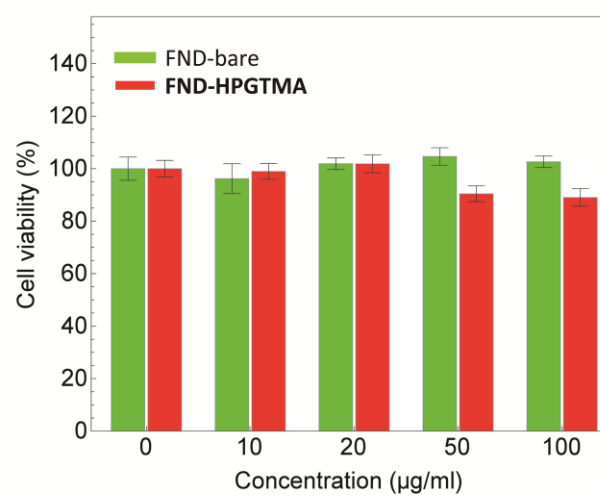

**Figure S4.** Cell viability testing of MCF7 cells treated with FND-bare and FND-HPGTMA for 24 hours using CCK-8. Values are means  $\pm$  standard deviations of three measurements. More than 90% of the cells were alive after the treatment at 100 µg/mL.

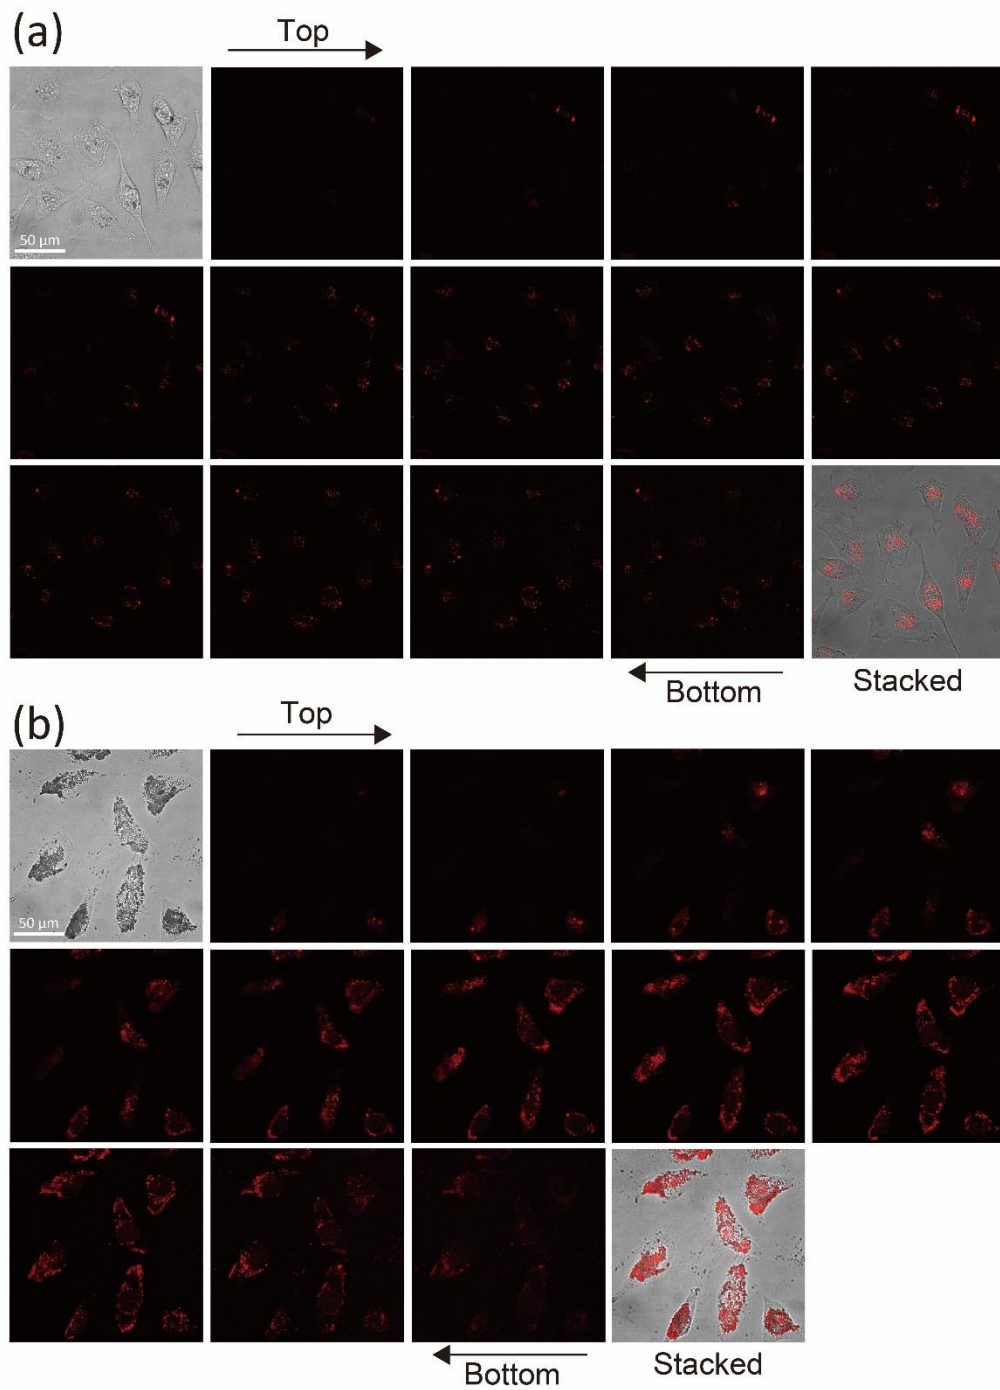

**Figure S5.** Bright field image, confocal fluorescence images (1 µm/step), and image of bright field and z-stacked fluorescence merged images of HeLa cells treated with (a) 10 µg/mL and (b) 100 µg/mL of FND-HPGTMA.

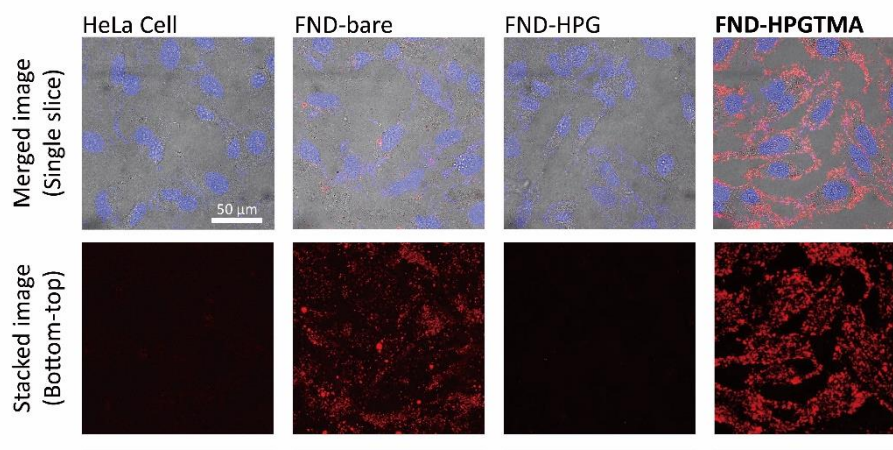

**Figure S6.** Single-sliced bright field and fluorescence merged images (FNDs in red; nuclei in blue) and z-stacked FNDs fluorescence images of cells from bottom to top in three dimensions (vertical thickness of 0.5  $\mu\text{m}/\text{step}$ ). Cells were treated with FND samples at 100  $\mu\text{g}/\text{mL}$  for 1 h.

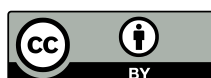

© 2018 by the authors. Submitted for possible open access publication under the terms and conditions of the Creative Commons Attribution (CC BY) license (<http://creativecommons.org/licenses/by/4.0/>).
